# Supplementary material for: Hydration and ion pair formation in aqueous Y3+–salt solutions
Source: Royal Society of Chemistry journal article supplement (doi:10.1039/c5dt02586a), 2015-01-01
Supplement: c5dt02586a1.pdf [file c5dt02586a1.pdf]

## Supplementary Material

**Table S1.** Simulation results of  $[Y(H_2O)_8]^{3+}$  clusters in the gas phase and similar clusters with a polarizable continuum (PC): Symmetry of the clusters, number of negative frequencies, geometrical parameters of the clusters, the electronic energies calculated. The data for the  $\nu_1$  Y-O breathing mode is also given for these DFT clusters.

| Level of theory / basis set | symmetry  | negative frequencies | $\nu_1 / \text{cm}^{-1}$ * | Y-O / Å      | O-H / Å      | H-O-H / °    | energy in hartree  |
|-----------------------------|-----------|----------------------|----------------------------|--------------|--------------|--------------|--------------------|
| <b>gas phase cluster</b>    |           |                      |                            |              |              |              |                    |
| B3LYP/LANL2DZ               | C2        | none                 | 336.6                      | 2.399        | 0.981        | 109.6        | -648.698328        |
| <b>B3LYP/LANL2DZ</b>        | <b>S8</b> | <b>none</b>          | <b>336.5</b>               | <b>2.399</b> | <b>0.981</b> | <b>109.6</b> | <b>-648.698322</b> |
| B3LYP/LANL2DZ               | D4        | 1                    | (334.2)                    | 2.409        | 0.981        | 109.1        | -648.688320        |
| B3LYP/LANL2DZ/6-31G         | C2        | none                 | 338.3                      | 2.396        | 0.979        | 109.6        | -648.511648        |
| B3LYP/LANL2DZ/6-31G(d)      | C2        | none                 | 328.4                      | 2.408        | 0.977        | 106.0        | -648.591925        |
| B3LYP/LANL2DZ/6-1G+(d,p)    | C2        | none                 | 338.3                      | 2.396        | 0.978        | 109.6        | -648.511648        |
| B3LYP/LANL2DZ/D95+*         | C2        | none                 | 334.0                      | 2.414        | 0.978        | 105.9        | -648.799550        |
| B3LYP/LANL2DZ/D95**         | C2        | none                 | 324.7                      | 2.413        | 0.975        | 105.9        | -648.848420        |
| B3LYP/LANL2DZ/D95+**        | C2        | none                 | 331.8                      | 2.416        | 0.975        | 105.7        | -648.864907        |
| <b>Cluster with PCM</b>     |           |                      |                            |              |              |              |                    |
| <b>B3LYP/LANL2DZ</b>        | <b>S8</b> | <b>none</b>          | <b>372.1</b>               | <b>2.354</b> | <b>0.989</b> | <b>110.9</b> | <b>-649.355492</b> |
| B3LYP/LANL2DZ/6-31G+(d,p)   | C2        | -                    | no result                  | -            | -            | -            | -                  |
| B3LYP/LANL2DZ/6-31G         | C2        | -                    | no result                  | -            | -            | -            | -                  |

- Remark: For the  $[Y(H_2O)_8]^{3+}$  cluster with its 25 atoms  $3 \times 25 - 6 = 69$  normal modes are expected with the irreducible representation of the normal modes:  $\Gamma_{\nu}(S_8) = 8a(\text{Ra}) + 9b(\text{i.r.}) + 18e_1(\text{i.r.}) + 18e_2(\text{Ra}) + 16e_3(\text{Ra})$ . The mode  $\nu_1$  is the totally symmetric Y-O mode, the so called breathing mode.

**Table S2.** Simulation results of a  $[Y(H_2O)_6]^{3+}$  gas phase cluster and a similar clusters with a polarizable continuum (PCM). The symmetry of the cluster is  $T_h$  in both states. Given are frequency for the  $\nu_1$  Y-O breathing, the geometrical parameters of the cluster and the calculated electronic energy.

| Level of theory / basis set | $\nu_1 / \text{cm}^{-1} *$ | Y-O / Å | O-H / Å | H-O-H / ° | Energy in hartree |
|-----------------------------|----------------------------|---------|---------|-----------|-------------------|
| B3LYP/LANL2DZ               | 376.5                      | 2.322   | 0.986   | 107.8     | -495.741633       |
| B3LYP/LANL2DZ<br>+ PCM      | 407.5                      | 2.285   | 0.986   | 109.4     | -496.332300       |

- The mode  $\nu_1$  is the totally symmetric mode of Y-O (breathing mode).

**Table S3:** DFT frequencies at the B3LYP/ LANL2DZ level of theory for  $[Y(H_2O)_8]^{3+}$  with a solvation shell (PC model). The irreducible representation of vibrations leads to  $\Gamma_v(S_8) = 8a$  (Ra) + 9b (i.r.) + 18e<sub>1</sub> (Ra, i.r.) + 18e<sub>2</sub> (Ra) + 16e<sub>3</sub> (Ra).

| peak position<br>cm <sup>-1</sup> | sym-<br>metry        | assignment                                | peak position<br>cm <sup>-1</sup> | sym-<br>metry  | assignment                       |
|-----------------------------------|----------------------|-------------------------------------------|-----------------------------------|----------------|----------------------------------|
| <b>27.1</b>                       | <b>e<sub>2</sub></b> | <b>δ YO<sub>8</sub></b>                   | 425.8                             | e <sub>1</sub> | ω H <sub>2</sub> O               |
| <b>101.1</b>                      | <b>b</b>             | <b>δ YO<sub>8</sub></b>                   | 523.0                             | b              | ρ H <sub>2</sub> O               |
| <b>109.3</b>                      | <b>e<sub>1</sub></b> | <b>δ YO<sub>8</sub></b>                   | 538.6                             | a              | ρ H <sub>2</sub> O               |
| <b>136.4</b>                      | <b>b</b>             | <b>δ YO<sub>8</sub></b>                   | 566.0                             | e <sub>1</sub> | ρ H <sub>2</sub> O               |
| <b>141.1</b>                      | <b>a</b>             | <b>δ YO<sub>8</sub></b>                   | 566.2                             | e <sub>3</sub> | ρ H <sub>2</sub> O               |
| <b>154.8</b>                      | <b>e<sub>1</sub></b> | <b>δ YO<sub>8</sub></b>                   | 594.7                             | e <sub>2</sub> | ρ H <sub>2</sub> O               |
| <b>154.9</b>                      | <b>e<sub>3</sub></b> | <b>δ YO<sub>8</sub></b>                   | 1570.3                            | e <sub>2</sub> | δ H <sub>2</sub> O               |
| <b>163.0</b>                      | <b>e<sub>2</sub></b> | <b>δ YO<sub>8</sub></b>                   | 1575.3                            | e <sub>3</sub> | δ H <sub>2</sub> O               |
| 215.5                             | e <sub>2</sub>       | τ H <sub>2</sub> O                        | 1580.0                            | e <sub>1</sub> | δ H <sub>2</sub> O               |
| 250.0                             | e <sub>1</sub>       | τ H <sub>2</sub> O                        | 1581.2                            | b              | δ H <sub>2</sub> O               |
| 278.8                             | e <sub>3</sub>       | τ H <sub>2</sub> O                        | 1589.6                            | a              | δ H <sub>2</sub> O               |
| <b>283.6</b>                      | <b>e<sub>2</sub></b> | <b>v YO<sub>8</sub></b>                   | 3453.4                            | e <sub>2</sub> | v <sub>s</sub> H <sub>2</sub> O  |
| <b>301.3</b>                      | <b>e<sub>3</sub></b> | <b>v YO<sub>8</sub>, τ H<sub>2</sub>O</b> | 3454.0                            | e <sub>3</sub> | v <sub>s</sub> H <sub>2</sub> O  |
| 314.7                             | a                    | τH <sub>2</sub> O                         | 3456.9                            | b              | v <sub>s</sub> H <sub>2</sub> O  |
| <b>336.7</b>                      | <b>b</b>             | <b>v YO<sub>8</sub>, ω H<sub>2</sub>O</b> | 3459.6                            | e <sub>1</sub> | v <sub>s</sub> H <sub>2</sub> O  |
| <b>348.5</b>                      | <b>e<sub>1</sub></b> | <b>v YO<sub>8</sub>, ω H<sub>2</sub>O</b> | 3476.5                            | a              | v <sub>s</sub> H <sub>2</sub> O  |
| 367.0                             | b                    | τH <sub>2</sub> O, ω H <sub>2</sub> O     | 3548.1                            | a              | v <sub>as</sub> H <sub>2</sub> O |
| <b>372.1</b>                      | <b>a</b>             | <b>v<sub>s</sub> YO<sub>8</sub></b>       | 3548.3                            | e <sub>1</sub> | v <sub>as</sub> H <sub>2</sub> O |
| 375.7                             | e <sub>3</sub>       | ω H <sub>2</sub> O                        | 3548.3                            | e <sub>3</sub> | v <sub>as</sub> H <sub>2</sub> O |
| 376.4                             | a                    | ω H <sub>2</sub> O                        | 3548.3                            | e <sub>2</sub> | v <sub>as</sub> H <sub>2</sub> O |
| 384.8                             | b                    | ω H <sub>2</sub> O                        | 3548.5                            | b              | v <sub>as</sub> H <sub>2</sub> O |
| 397.6                             | e <sub>2</sub>       | ω H <sub>2</sub> O                        |                                   |                |                                  |

Note, that the skeletal vibrations are written in bold type letters, with the breathing vibrational frequency of the cluster at 372.1cm<sup>-1</sup>. Notations: v<sub>as</sub>: antisymmetric stretch, v<sub>s</sub>: symmetric stretch, δ: deformation; H<sub>2</sub>O librations: ρ: rocking, ω: wagging, τ: twisting

**Table S4.** Our Raman data and band assignments of  $\text{CF}_3\text{SO}_3^-$ (aq) at 23 °C.

| Raman                           |       |                         |               |          | assignment                                        |
|---------------------------------|-------|-------------------------|---------------|----------|---------------------------------------------------|
| peak position/ $\text{cm}^{-1}$ | $A_i$ | fwhh / $\text{cm}^{-1}$ | depol. degree | symmetry |                                                   |
| -                               | -     | -                       | -             | $a_2$    | torsion                                           |
| 212                             | 0.97  | 18.1                    | 0.65          | e        | $\tau_3\text{FC- SO}_3$                           |
| 319                             | 40.81 | 12.85                   | 0.25          | $a_1$    | $\nu\text{ C-S}$                                  |
| 351                             | 21.30 | 14.7                    | 0.70          | e        | $\tau_3\text{FC- SO}_3$                           |
| 518.8                           | 1.97  | 16.1                    | 0.64          | e        | $\delta_s\text{ FCF} + \delta_s\text{ SO}_3$      |
| 577.9                           | 14.61 | 17.7                    | 0.74          | e        | $\delta_{as}\text{ FCF}, \delta_{as}\text{ OSO}$  |
| 640.5                           | 0.78  | 25.9                    | 0.240         | $a_1$    | $\delta_{as}\text{ CF}_3, \delta_{as}\text{ OSO}$ |
| 764.5                           | 48.05 | 8.45                    | 0.0023        | $a_1$    | $\delta_s\text{ CF}_3, \delta_s\text{ SO}_3$      |
| 1033.3                          | 100   | 12.9                    | 0.0097        | $a_1$    | $\nu_s\text{ SO}_3, \nu_s\text{ CF}_3$            |
| 1182                            | 2.33  | 27.8                    | 0.71          | e        | $\nu_{as}\text{ CF}_3$                            |
| 1227.5                          | 4.54  | 9.8                     | 0.21          | $a_1$    | $\nu_s\text{ CF}_3$                               |
| 1254.5 *                        | 2.38  | 46                      | 0.63          | e        | $\nu_{as}\text{ SO}_3$                            |
| 1281.8                          | 15.79 | 33                      | 0.70          |          |                                                   |

- This band appears as a double band; data from band fit procedure

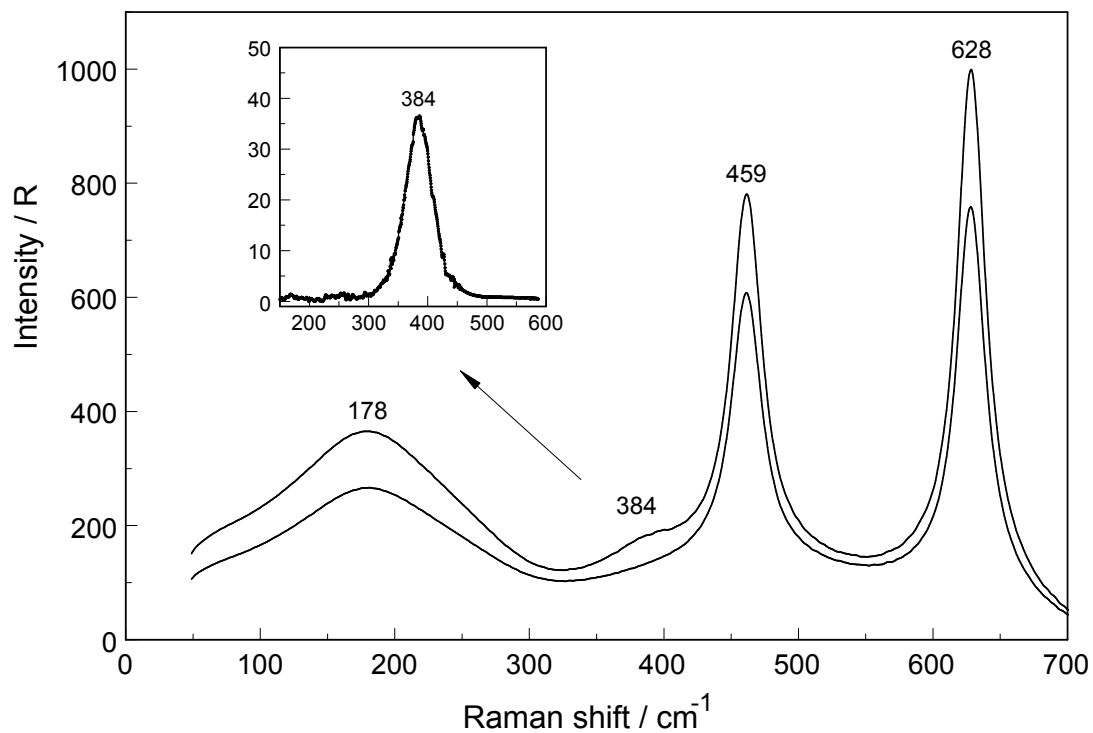

**Figure S1.** Polarized and depolarized Raman scattering profiles of  $0.256 \text{ mol}\cdot\text{L}^{-1} \text{ Y}(\text{ClO}_4)_3(\text{aq})$  ( $R_w = 211$ ). A. The inset shows the isotropic profile of the  $\text{YO}_8$  breathing mode at  $384 \text{ cm}^{-1}$  ( $R_{\text{iso}} = R_{\text{VV}} - 4/3R_{\text{VH}}$ ).

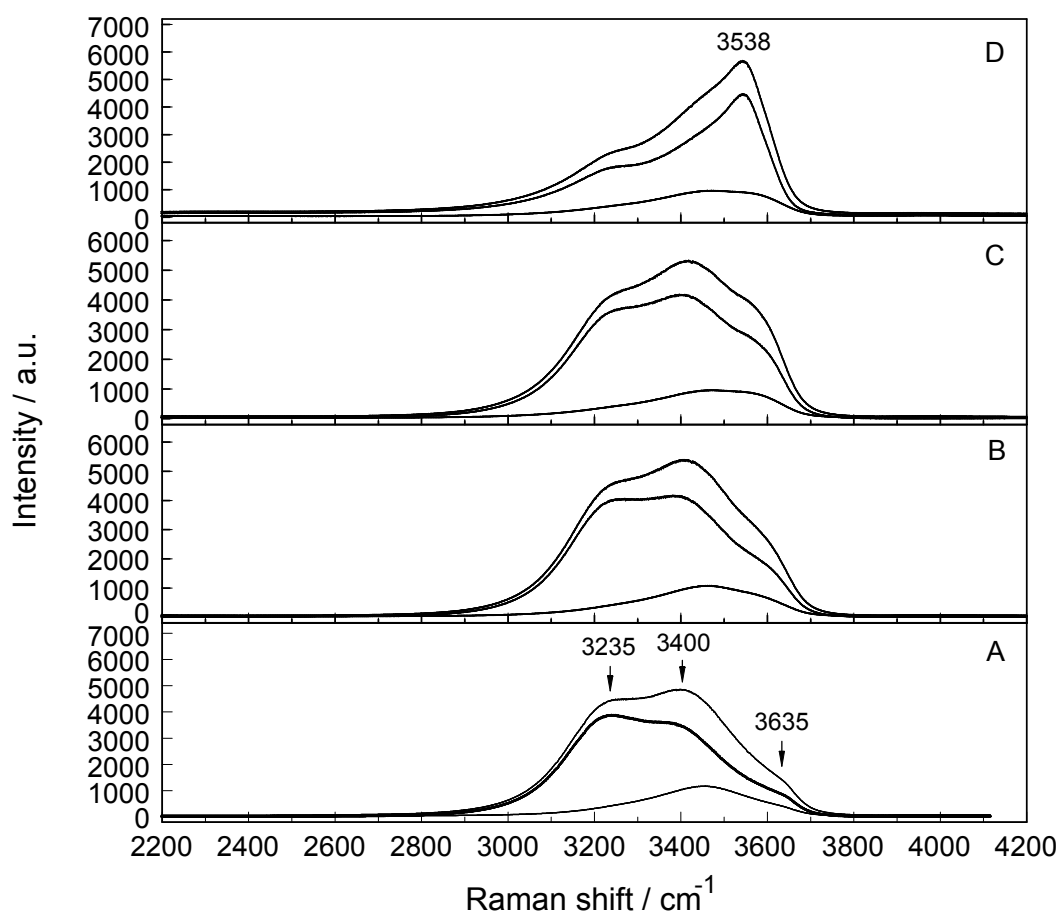

**Figure S2.** The O-H stretching region of water from 2200 – 4200  $\text{cm}^{-1}$  for three aqueous  $\text{Y}(\text{ClO}_4)_3$  solutions in comparison with neat liquid water. From bottom to top: (A)  $\text{H}_2\text{O}$ , (B) 0.390, (C) 0.76 and (D) 1.770  $\text{molL}^{-1}$   $\text{Y}(\text{ClO}_4)_3$ . At the bottom (A) the O-H profile of water with its characteristic bands is shown and above (B-D) the profiles of  $\text{Y}(\text{ClO}_4)_3(\text{aq})$ . With increasing solute concentration a mode at 3538  $\text{cm}^{-1}$  is dominating the O-H profiles. (D) The band component of water at 3235  $\text{cm}^{-1}$  is still observable while the component at 3405  $\text{cm}^{-1}$  is completely overlapped by the strong band,  $\nu$  O-H $\cdots$   $\text{ClO}_4^-$ , at 3538  $\text{cm}^{-1}$  of weakly H-bonded water.

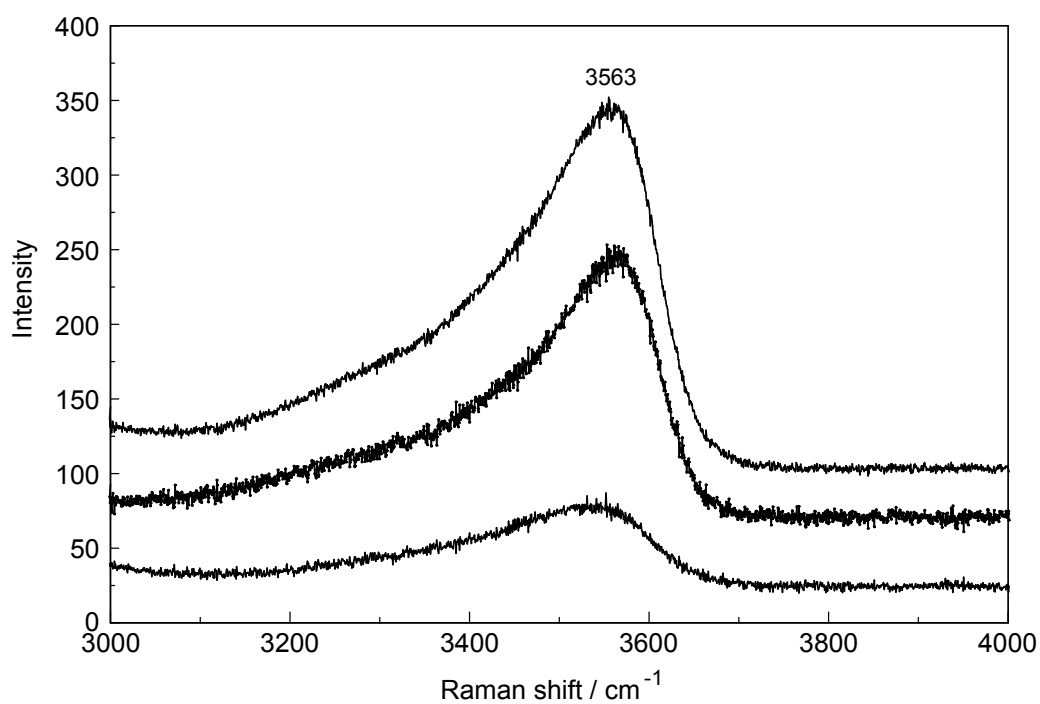

**Figure S3.** The O-H stretching region (HDO/D<sub>2</sub>O; ca. 3% HDO) of a 2.300 mol L<sup>-1</sup> Y(ClO<sub>4</sub>)<sub>3</sub> solution in D<sub>2</sub>O from 3000 – 4000 cm<sup>-1</sup>. The dominating O-H band at 3563 cm<sup>-1</sup> is due to the decoupled O-H oscillators, HDO/D<sub>2</sub>O, weakly H-bonded to ClO<sub>4</sub><sup>-</sup>. In a concentrated Y(ClO<sub>4</sub>)<sub>3</sub> solution the O-H⋯ClO<sub>4</sub><sup>-</sup> band appears at 3538 cm<sup>-1</sup> (Figure S2).

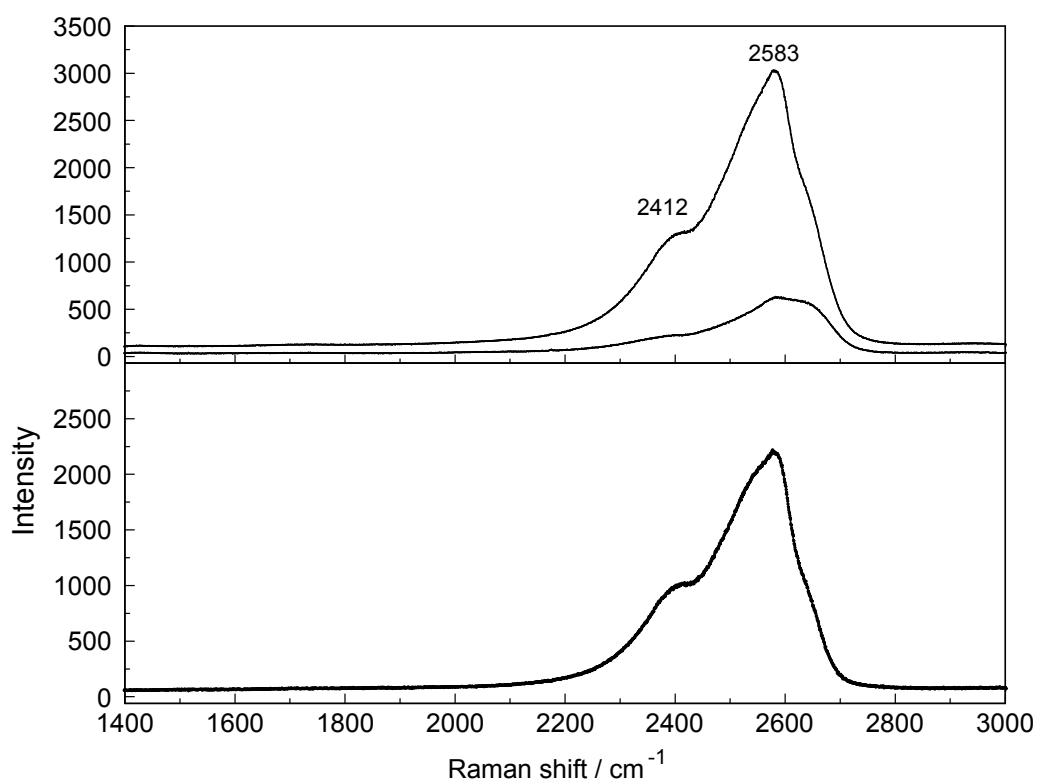

**Figure S4.** The O-D stretching region of heavy water from 1400 – 3000 cm<sup>-1</sup> of a 2.300 mol L<sup>-1</sup> Y(ClO<sub>4</sub>)<sub>3</sub> solution in D<sub>2</sub>O. The dominating O-D band at 2583 cm<sup>-1</sup> is due to the O-D oscillators weakly D-bonded to ClO<sub>4</sub><sup>-</sup>. Only one band component of the heavy water at 2412 cm<sup>-1</sup> appears while the component which normally appears at 2500 cm<sup>-1</sup> is almost completely overlapped by the strong band at 2583 cm<sup>-1</sup>.



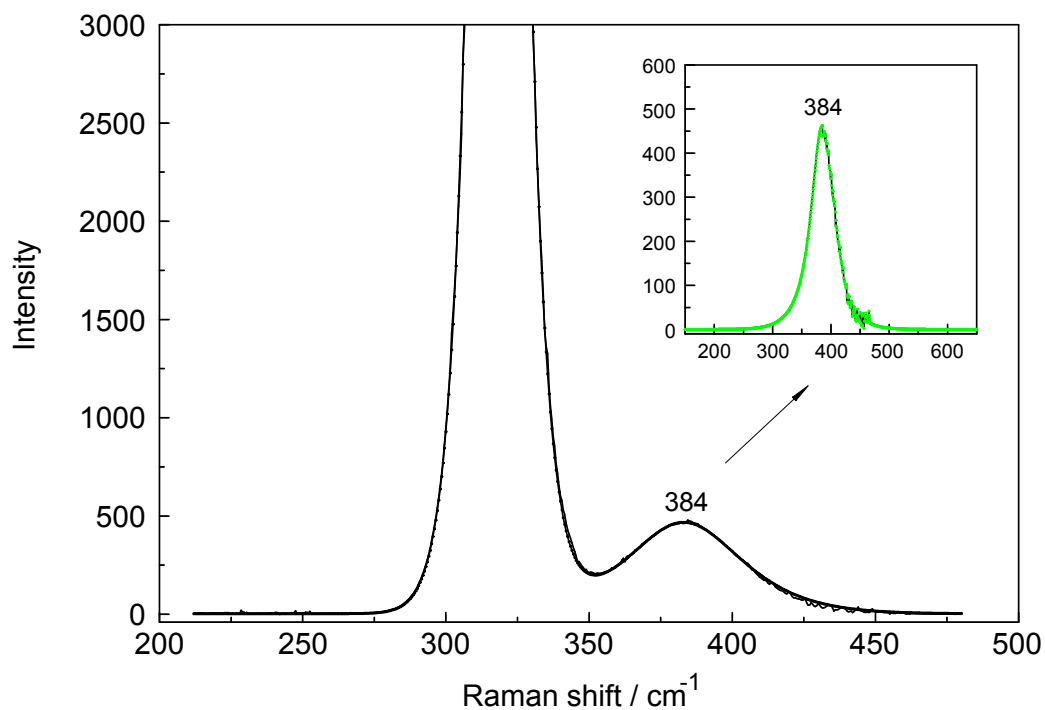

**Figure S5.** The isotropic Raman spectrum of a 1.10 molL<sup>-1</sup> Y(CF<sub>3</sub>SO<sub>3</sub>)<sub>3</sub> solution in the wavenumber range from 212 – 460 cm<sup>-1</sup> and the sum curve of the fit. The inset shows the result of the difference spectrum of the Y(CF<sub>3</sub>SO<sub>3</sub>)<sub>3</sub> spectrum from which the spectrum of CF<sub>3</sub>SO<sub>3</sub><sup>-</sup>(aq) has been subtracted. The band at 384 cm<sup>-1</sup> is assigned to the YO<sub>8</sub> breathing mode.

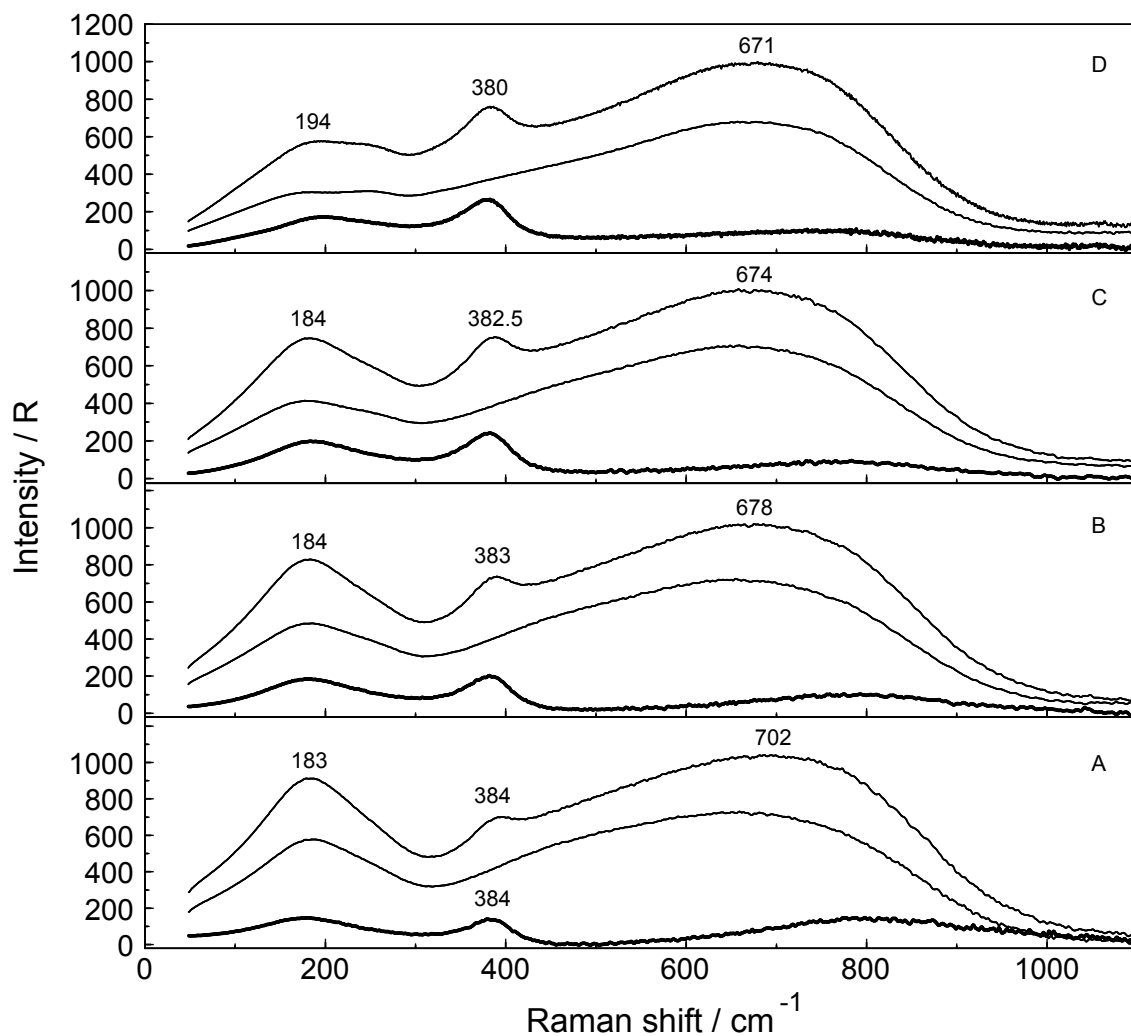

**Figure S6.** Raman scattering profiles (polarized, depolarized and isotropic (darker line) scattering orientations) of four  $\text{YCl}_3$  solutions. From bottom to top: (A)  $0.479 \text{ mol}\cdot\text{L}^{-1}$ ; (B)  $0.803 \text{ mol}\cdot\text{L}^{-1}$ ; (C)  $1.01 \text{ mol}\cdot\text{L}^{-1}$  and (D)  $2.378 \text{ mol}\cdot\text{L}^{-1}$ . The bands of the solute water are the restricted translation and the librational bands at  $183\text{-}194 \text{ cm}^{-1}$  and  $703 - 671 \text{ cm}^{-1}$ .

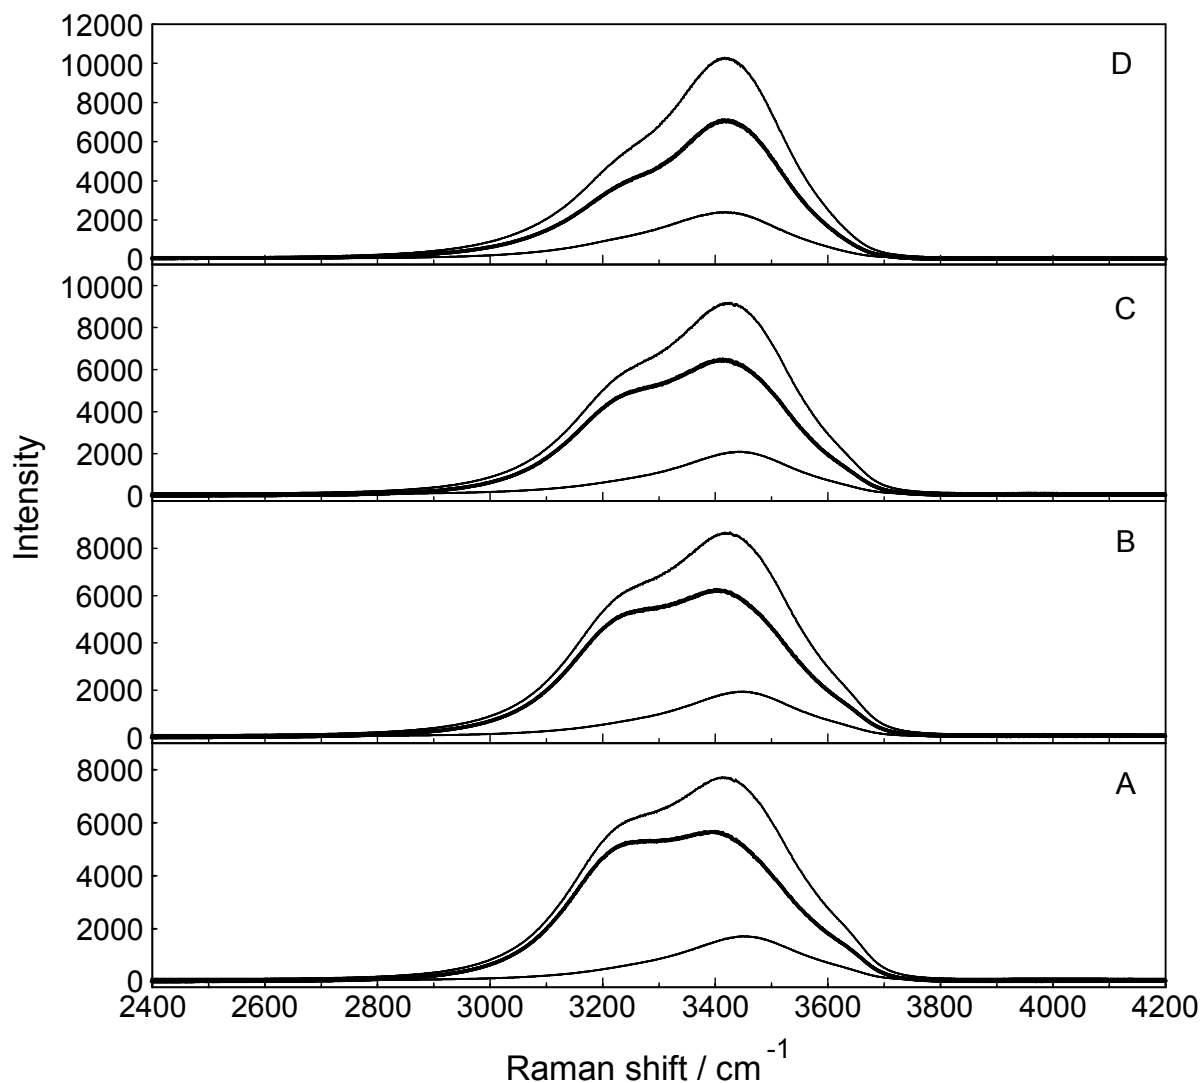

**Figure S7.** Raman scattering profiles (polarized, depolarized and isotropic (darker line) scattering orientations) of four  $\text{YCl}_3$  solutions. From bottom to top: (A)  $0.479 \text{ mol}\cdot\text{L}^{-1}$ ; (B)  $0.803 \text{ mol}\cdot\text{L}^{-1}$ ; (C)  $1.01 \text{ mol}\cdot\text{L}^{-1}$  and (D)  $2.378 \text{ mol}\cdot\text{L}^{-1}$ . Shown are the two water band components of the O-H stretching profile. The component bands for the O-H stretching profile of neat water are  $3225$  and  $3405 \text{ cm}^{-1}$  and a shoulder at  $3630 \text{ cm}^{-1}$ . The peak positions shift slightly to higher wavenumbers and for the  $2.378 \text{ mol}\cdot\text{L}^{-1} \text{YCl}_3$  solution the band positions peak at  $3220 \text{ cm}^{-1}$ ,  $3425 \text{ cm}^{-1}$  and a small shoulder at  $3595\text{-}3625 \text{ cm}^{-1}$ .

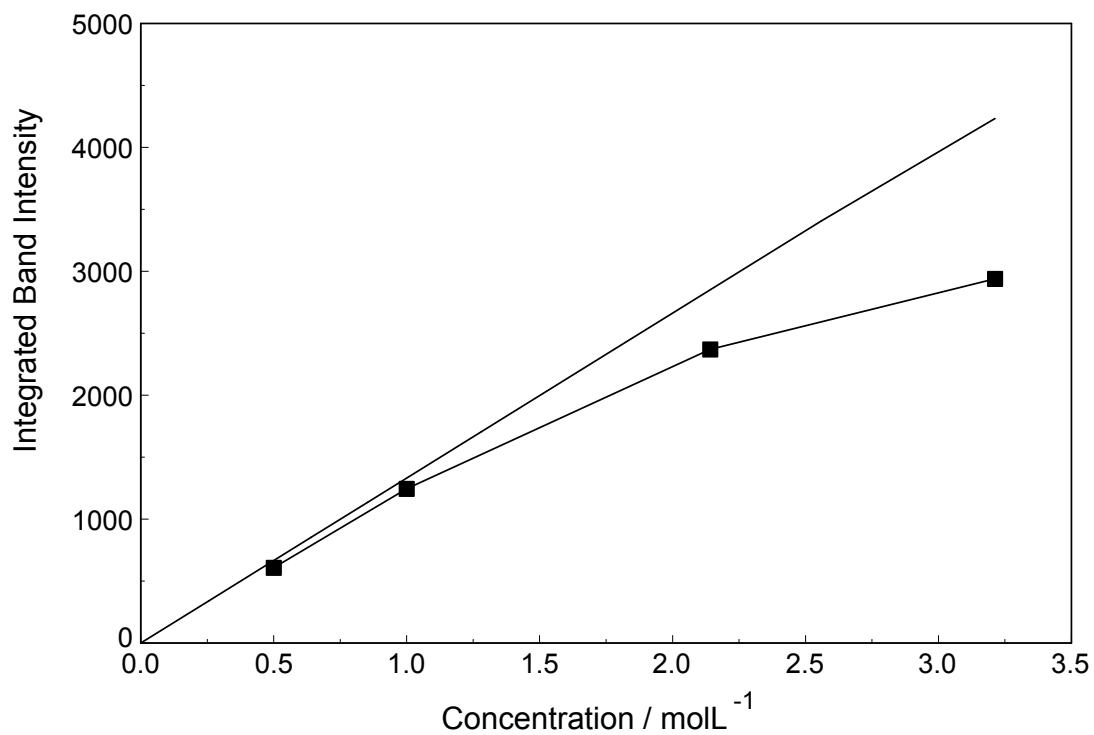

**Figure S8.** Quantitative Raman results: Integrated band intensities of the  $\nu_1\text{YO}_8$  band versus stoichiometric concentration of four  $\text{YCl}_3$  solutions (black squares) and the curve of the band intensity of  $\nu_1\text{YO}_8$  as a function of concentration in  $\text{Y}(\text{ClO}_4)_3(\text{aq})$ .

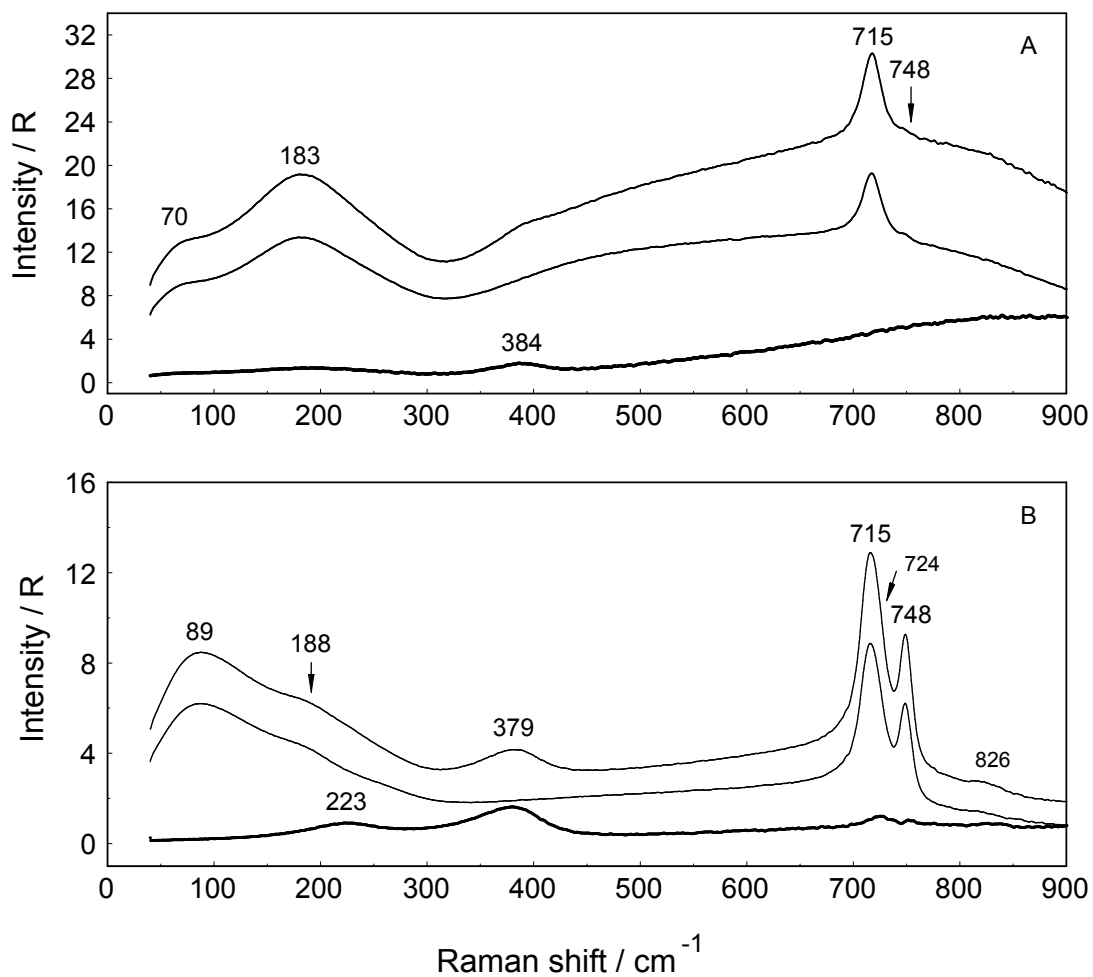

**Figure S9.** Raman spectra (R- format, all three scattering contributions): (A) a dilute solution at 0.198 mol·L<sup>-1</sup> Y(NO<sub>3</sub>)<sub>3</sub> and (B) a concentrated solution at 2.035 mol·L<sup>-1</sup> in the frequency range from 40 - 900 cm<sup>-1</sup>. Note the very weak band at 826 cm<sup>-1</sup> in panel (B) which is due to the normally infrared active mode,  $\nu_2(a_2'')$ .

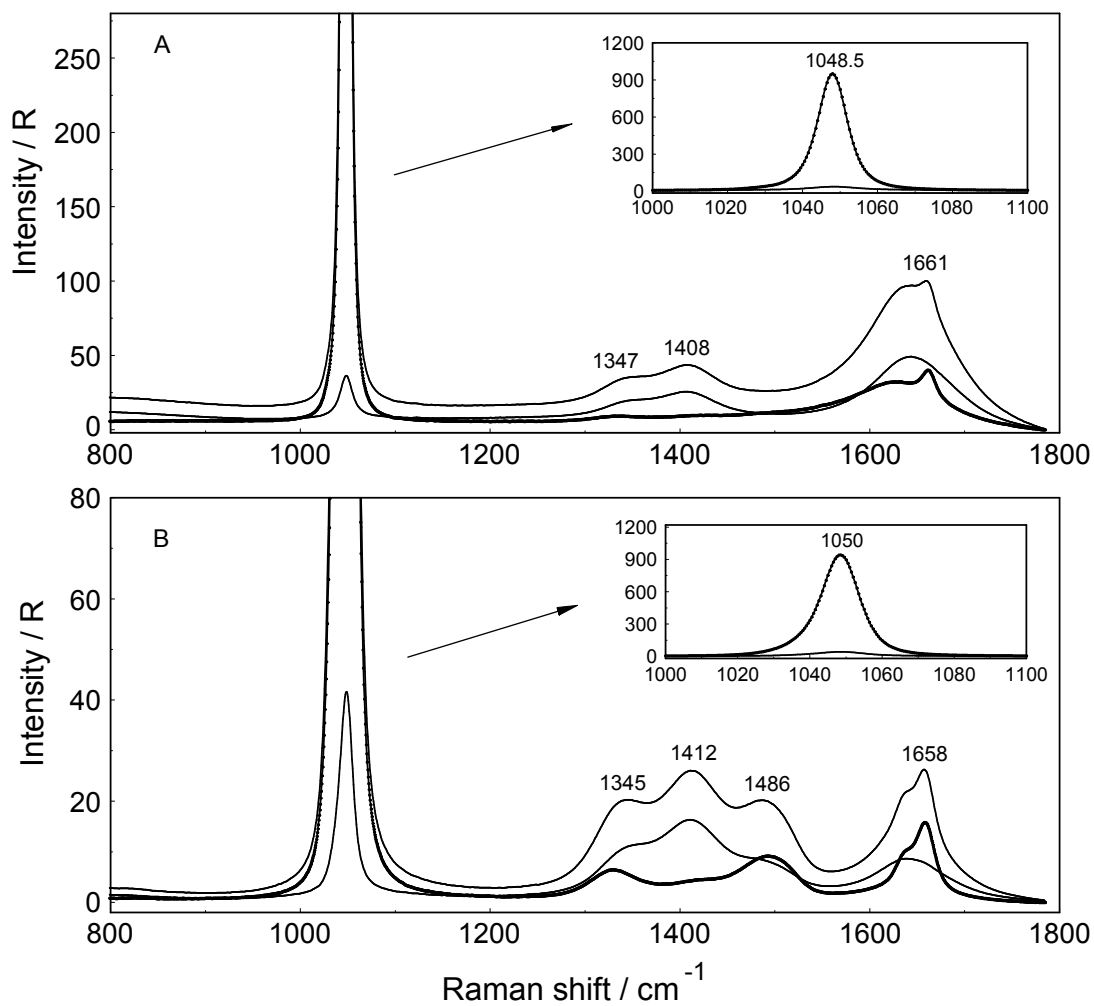

**Figure S10.** Raman spectra (R- format, all three scattering contributions) of A) dilute  $\text{Y}(\text{NO}_3)_3$  solution at  $0.198 \text{ mol}\cdot\text{L}^{-1}$  and B) of a  $2.035 \text{ mol}\cdot\text{L}^{-1}$  solution at from  $800 - 1800 \text{ cm}^{-1}$ . The insets show the symmetric N-O stretching band in more detail (isotropic scattering and anisotropic scattering).
